# Supplementary material
Source: MDPI journal article supplement (https://www.mdpi.com/2306-5729/2/3/24)
Supplement: s1 [file s1]

Table 1: Thermodynamic data of Fusarium oxysporum biomass on glucose substrate
Temperature (K)	Heat Capacity (J/K)	Specific Heat Capacity (J/g.K)	Reversing Heat Flow (W/g)	Non-Reversing Heat Flow (W/g)	Total Heat Flow (W/g)	Modulated Heat flow (W/g)	Modulated Temperature (K)
127	0.000961	0.436884	-0.02184	-0.10929	-0.13113	-0.14258	126.82
128	0.000974	0.442879	-0.02214	-0.11296	-0.1351	-0.07213	128.675
129	0.000972	0.441796	-0.02209	-0.1067	-0.12879	-0.082	127.944
130	0.000989	0.449671	-0.02248	-0.09989	-0.12237	-0.16418	130.682
131	0.001002	0.455275	-0.02276	-0.09685	-0.11961	-0.04467	131.171
132	0.001014	0.461118	-0.02306	-0.09482	-0.11787	-0.1115	131.041
133	0.001025	0.466041	-0.0233	-0.0935	-0.1168	-0.16416	133.836
134	0.001035	0.470296	-0.02351	-0.09275	-0.11626	-0.04323	134.069
135	0.001043	0.474015	-0.0237	-0.09207	-0.11577	-0.11589	134.073
136	0.001052	0.478187	-0.02391	-0.09141	-0.11532	-0.16321	136.854
137	0.001064	0.483507	-0.02418	-0.09091	-0.11509	-0.04206	137.047
138	0.001076	0.489172	-0.02446	-0.09052	-0.11498	-0.11622	137.093
139	0.001087	0.49407	-0.0247	-0.09031	-0.11502	-0.16431	139.849
140	0.001096	0.498007	-0.0249	-0.0901	-0.11501	-0.04289	140.048
141	0.001103	0.501456	-0.02507	-0.08996	-0.11504	-0.11746	140.095
142	0.001111	0.505178	-0.02526	-0.08975	-0.11501	-0.16416	142.849
143	0.001121	0.509441	-0.02547	-0.0895	-0.11497	-0.04237	143.045
144	0.001132	0.51448	-0.02572	-0.08921	-0.11494	-0.11733	143.105
145	0.001143	0.51945	-0.02597	-0.08901	-0.11499	-0.1666	145.84
146	0.001153	0.524025	-0.0262	-0.08885	-0.11505	-0.04168	146.05
147	0.00116	0.527166	-0.02636	-0.08884	-0.1152	-0.11802	146.104
148	0.001165	0.529493	-0.02647	-0.08874	-0.11522	-0.16678	148.836
149	0.001169	0.53126	-0.02656	-0.08861	-0.11517	-0.04255	149.052
150	0.001173	0.533285	-0.02666	-0.08848	-0.11515	-0.11784	149.104
151	0.001178	0.535537	-0.02678	-0.08849	-0.11527	-0.16714	151.832
152	0.001184	0.538067	-0.0269	-0.08855	-0.11546	-0.04288	152.054
153	0.001189	0.540625	-0.02703	-0.08863	-0.11566	-0.11877	152.1
154	0.001195	0.543202	-0.02716	-0.08864	-0.1158	-0.16949	154.838
155	0.001201	0.546069	-0.0273	-0.08858	-0.11589	-0.04347	155.052
156	0.001208	0.549166	-0.02746	-0.08844	-0.1159	-0.12019	155.108
157	0.001214	0.551943	-0.0276	-0.08828	-0.11587	-0.17047	157.835
158	0.001218	0.553645	-0.02768	-0.08814	-0.11583	-0.0424	158.055
159	0.00122	0.554696	-0.02773	-0.08812	-0.11585	-0.12024	158.105
160	0.001223	0.555993	-0.0278	-0.08811	-0.11591	-0.17088	160.83
161	0.001228	0.558282	-0.02791	-0.08806	-0.11597	-0.04304	161.058
162	0.001236	0.561641	-0.02808	-0.08785	-0.11593	-0.11965	161.102
163	0.001243	0.565045	-0.02825	-0.08765	-0.11591	-0.17227	163.827
164	0.001251	0.56856	-0.02843	-0.08748	-0.1159	-0.04158	164.061
165	0.001258	0.571615	-0.02858	-0.08739	-0.11597	-0.12039	164.107
166	0.001264	0.574761	-0.02874	-0.08729	-0.11603	-0.17345	166.833
167	0.001271	0.577628	-0.02888	-0.08726	-0.11614	-0.04158	167.059
168	0.001276	0.580076	-0.029	-0.0873	-0.1163	-0.12249	167.106
169	0.00128	0.58186	-0.02909	-0.08733	-0.11642	-0.1747	169.831
170	0.001283	0.583234	-0.02916	-0.08737	-0.11654	-0.04157	170.061
171	0.001286	0.584616	-0.02923	-0.08742	-0.11665	-0.12282	170.106
172	0.00129	0.586401	-0.02932	-0.08752	-0.11684	-0.17472	172.831
173	0.001295	0.588513	-0.02943	-0.08753	-0.11696	-0.04071	173.062
174	0.0013	0.591013	-0.02955	-0.08748	-0.11703	-0.12399	173.101
175	0.001306	0.593447	-0.02967	-0.08745	-0.11712	-0.17626	175.826
176	0.00131	0.595655	-0.02978	-0.0875	-0.11728	-0.04107	176.065
177	0.001314	0.597389	-0.02987	-0.08761	-0.11748	-0.12486	176.101
178	0.001317	0.598803	-0.02994	-0.08771	-0.11765	-0.17806	178.825
179	0.001321	0.600417	-0.03002	-0.08775	-0.11777	-0.0406	179.067
180	0.001326	0.602581	-0.03013	-0.08768	-0.11781	-0.12477	179.098
181	0.001332	0.605302	-0.03027	-0.08753	-0.1178	-0.17857	181.822
182	0.001339	0.608483	-0.03042	-0.08744	-0.11787	-0.04081	182.069
183	0.001345	0.611182	-0.03056	-0.08751	-0.11807	-0.12644	182.097
184	0.00135	0.613697	-0.03068	-0.08777	-0.11845	-0.18014	184.821
185	0.001355	0.615745	-0.03079	-0.08804	-0.11883	-0.04061	185.07
186	0.001361	0.618709	-0.03094	-0.08817	-0.11911	-0.12721	185.104
187	0.001369	0.622126	-0.03111	-0.0883	-0.11941	-0.18146	187.829
188	0.001377	0.625987	-0.0313	-0.08845	-0.11975	-0.04156	188.068
189	0.001385	0.629353	-0.03147	-0.08861	-0.12008	-0.12957	188.102
190	0.00139	0.631825	-0.03159	-0.08874	-0.12033	-0.18284	190.828
191	0.001395	0.633976	-0.0317	-0.0889	-0.1206	-0.04015	191.07
192	0.0014	0.636232	-0.03181	-0.08915	-0.12097	-0.12946	191.1
193	0.001406	0.639184	-0.03196	-0.08946	-0.12142	-0.18462	193.826
194	0.001413	0.64231	-0.03212	-0.0897	-0.12182	-0.04126	194.072
195	0.001427	0.648685	-0.03243	-0.08966	-0.12209	-0.13012	194.098
196	0.001437	0.65335	-0.03267	-0.08961	-0.12228	-0.18808	196.823
197	0.001447	0.657814	-0.03289	-0.0896	-0.12249	-0.04019	197.073
198	0.001456	0.661706	-0.03309	-0.08974	-0.12282	-0.13377	197.097
199	0.001462	0.664591	-0.03323	-0.09004	-0.12327	-0.18782	199.823
200	0.001468	0.667079	-0.03335	-0.0904	-0.12375	-0.03979	200.075
201	0.001474	0.670126	-0.03351	-0.09067	-0.12417	-0.13449	200.096
202	0.001483	0.673875	-0.03369	-0.09083	-0.12452	-0.18992	202.819
203	0.001492	0.678206	-0.03391	-0.09093	-0.12484	-0.0402	203.077
204	0.001501	0.682088	-0.0341	-0.09107	-0.12517	-0.13714	203.093
205	0.001508	0.685581	-0.03428	-0.09116	-0.12544	-0.19264	205.819
206	0.001513	0.687912	-0.0344	-0.0913	-0.1257	-0.04062	206.077
207	0.001517	0.689416	-0.03447	-0.09153	-0.126	-0.13676	206.094
208	0.00152	0.690741	-0.03454	-0.09175	-0.12629	-0.19382	208.818
209	0.001523	0.692265	-0.03461	-0.09196	-0.12657	-0.04068	209.077
210	0.001529	0.694926	-0.03475	-0.09206	-0.12681	-0.13816	209.093
211	0.001536	0.69829	-0.03491	-0.09222	-0.12714	-0.19354	211.818
212	0.001546	0.702588	-0.03513	-0.09237	-0.1275	-0.04033	212.078
213	0.001554	0.706555	-0.03533	-0.09251	-0.12784	-0.14009	212.091
214	0.001562	0.709862	-0.03549	-0.09262	-0.12811	-0.19794	214.815
215	0.001567	0.712124	-0.03561	-0.09268	-0.12829	-0.04097	215.08
216	0.001571	0.714217	-0.03571	-0.09275	-0.12846	-0.14257	215.09
217	0.001576	0.716396	-0.03582	-0.09284	-0.12866	-0.19924	217.815
218	0.001582	0.718921	-0.03595	-0.09303	-0.12897	-0.04103	218.074
219	0.001588	0.721646	-0.03608	-0.09331	-0.12939	-0.14355	218.099
220	0.001594	0.724743	-0.03624	-0.09363	-0.12987	-0.1988	220.824
221	0.001602	0.728166	-0.03641	-0.09387	-0.13028	-0.04014	221.076
222	0.00161	0.731718	-0.03659	-0.094	-0.13058	-0.14511	221.096
223	0.001618	0.735572	-0.03678	-0.09402	-0.1308	-0.20292	223.822
224	0.001626	0.739226	-0.03696	-0.09405	-0.13101	-0.04049	224.078
225	0.001634	0.742866	-0.03714	-0.09408	-0.13122	-0.14675	224.096
226	0.001641	0.74604	-0.0373	-0.09413	-0.13144	-0.20401	226.821
227	0.00165	0.749925	-0.0375	-0.09426	-0.13176	-0.03977	227.078
228	0.001659	0.754164	-0.03771	-0.09443	-0.13213	-0.14675	227.095
229	0.001669	0.758562	-0.03793	-0.0946	-0.13253	-0.205	229.821
230	0.001676	0.761975	-0.0381	-0.09472	-0.13282	-0.04041	230.079
231	0.001682	0.764583	-0.03823	-0.09485	-0.13308	-0.14928	230.094
232	0.001688	0.76715	-0.03836	-0.09501	-0.13337	-0.20754	232.819
233	0.001695	0.770246	-0.03851	-0.09518	-0.13369	-0.03998	233.079
234	0.001703	0.77393	-0.0387	-0.09529	-0.13399	-0.15005	233.093
235	0.001711	0.77755	-0.03888	-0.09537	-0.13425	-0.20853	235.817
236	0.001718	0.780979	-0.03905	-0.09549	-0.13454	-0.04019	236.081
237	0.001725	0.784165	-0.03921	-0.09568	-0.13489	-0.15153	236.092
238	0.001733	0.787628	-0.03938	-0.09584	-0.13522	-0.21086	238.816
239	0.001741	0.791488	-0.03957	-0.09599	-0.13556	-0.04044	239.081
240	0.00175	0.795438	-0.03977	-0.09614	-0.13591	-0.15214	239.091
241	0.001758	0.7992	-0.03996	-0.09634	-0.1363	-0.21371	241.816
242	0.001766	0.802632	-0.04013	-0.09653	-0.13667	-0.04021	242.082
243	0.001774	0.806174	-0.04031	-0.09665	-0.13695	-0.15418	242.091
244	0.001781	0.80974	-0.04049	-0.0967	-0.13719	-0.21576	244.814
245	0.00179	0.813477	-0.04067	-0.09673	-0.13741	-0.04032	245.083
246	0.001798	0.817335	-0.04087	-0.0968	-0.13767	-0.1564	245.098
247	0.001807	0.821176	-0.04106	-0.09692	-0.13798	-0.21716	247.824
248	0.001815	0.825035	-0.04125	-0.09713	-0.13838	-0.04015	248.077
249	0.001823	0.828836	-0.04144	-0.09739	-0.13883	-0.15873	248.098
250	0.001833	0.833002	-0.04165	-0.09767	-0.13932	-0.21988	250.823
251	0.001843	0.83764	-0.04188	-0.09795	-0.13983	-0.03951	251.079
252	0.001854	0.842881	-0.04214	-0.09816	-0.1403	-0.15947	251.096
253	0.001866	0.848276	-0.04241	-0.09833	-0.14074	-0.22164	253.822
254	0.001879	0.854197	-0.04271	-0.09849	-0.1412	-0.04029	254.078
255	0.001892	0.859941	-0.043	-0.09872	-0.14172	-0.16078	254.094
256	0.001904	0.865411	-0.04327	-0.099	-0.14227	-0.22542	256.819
257	0.001915	0.870567	-0.04353	-0.09939	-0.14292	-0.04096	257.08
258	0.001927	0.875896	-0.04379	-0.09982	-0.14362	-0.16202	257.095
259	0.001939	0.881397	-0.04407	-0.10032	-0.14439	-0.23031	259.819
260	0.001951	0.886705	-0.04434	-0.10085	-0.14519	-0.04171	260.079
261	0.001962	0.891628	-0.04458	-0.10147	-0.14606	-0.1651	260.094
262	0.001973	0.896717	-0.04484	-0.10218	-0.14702	-0.23382	262.819
263	0.001985	0.902292	-0.04511	-0.10299	-0.14811	-0.0438	263.079
264	0.001999	0.908848	-0.04544	-0.10383	-0.14927	-0.168	263.092
265	0.002014	0.915631	-0.04578	-0.10478	-0.15057	-0.23904	265.817
266	0.002028	0.921942	-0.0461	-0.10594	-0.15204	-0.04566	266.079
267	0.002038	0.92652	-0.04633	-0.10752	-0.15384	-0.17344	266.09
268	0.002047	0.930446	-0.04652	-0.10935	-0.15587	-0.24639	268.815
269	0.002055	0.933915	-0.0467	-0.11116	-0.15786	-0.05176	269.08
270	0.002064	0.938238	-0.04691	-0.1127	-0.15962	-0.18124	269.099
271	0.002073	0.942423	-0.04712	-0.11401	-0.16113	-0.25015	271.825
272	0.002082	0.946583	-0.04733	-0.11523	-0.16255	-0.05425	272.075
273.15	0.002093	0.951196	-0.04756	-0.11669	-0.16425	-0.21788	272.423
274	0.002101	0.95492	-0.04775	-0.11779	-0.16554	-0.25715	274.823
275	0.002111	0.959401	-0.04797	-0.1192	-0.16717	-0.0575	275.075
276	0.002119	0.963172	-0.04816	-0.1208	-0.16896	-0.18971	275.098
277	0.002126	0.966217	-0.04831	-0.12253	-0.17084	-0.26233	277.824
278	0.002131	0.968521	-0.04843	-0.12428	-0.17271	-0.06355	278.075
279	0.002134	0.970184	-0.04851	-0.12611	-0.17461	-0.19516	278.096
280	0.002137	0.971185	-0.04856	-0.12802	-0.17658	-0.27055	280.823
281	0.002136	0.97106	-0.04855	-0.12997	-0.17852	-0.0697	281.074
282	0.002136	0.970749	-0.04854	-0.13195	-0.18048	-0.20367	281.095
283	0.002135	0.970307	-0.04852	-0.13391	-0.18243	-0.27661	283.822
284	0.002133	0.969409	-0.04847	-0.13597	-0.18444	-0.07564	284.074
285	0.00213	0.968354	-0.04842	-0.13817	-0.18658	-0.20795	284.096
286	0.002128	0.967397	-0.04837	-0.14044	-0.18881	-0.28321	286.822
287	0.002126	0.966545	-0.04833	-0.1428	-0.19113	-0.08256	287.072
288	0.002125	0.96582	-0.04829	-0.14522	-0.19351	-0.21644	287.094
289	0.002122	0.964769	-0.04824	-0.14781	-0.19605	-0.28866	289.822
290	0.002124	0.965272	-0.04826	-0.15058	-0.19884	-0.09057	290.071
291	0.002126	0.966224	-0.04831	-0.15346	-0.20177	-0.22653	290.103
292	0.002129	0.967896	-0.04839	-0.1564	-0.20479	-0.29898	292.831
293	0.002133	0.969378	-0.04847	-0.15935	-0.20781	-0.09846	293.064
294	0.002136	0.970928	-0.04855	-0.16233	-0.21088	-0.23604	293.102
295	0.00214	0.972693	-0.04863	-0.16538	-0.21401	-0.31072	295.829
296	0.002143	0.974095	-0.0487	-0.16852	-0.21722	-0.10959	296.064
297	0.002147	0.975776	-0.04879	-0.17165	-0.22044	-0.24491	296.1
298.15	0.002151	0.977833	-0.04889	-0.17521	-0.2241	-0.2852	299.11
299	0.002155	0.979661	-0.04898	-0.17782	-0.2268	-0.11874	299.064
300	0.002159	0.981203	-0.04906	-0.18096	-0.23002	-0.25641	299.098
301	0.002161	0.98213	-0.04911	-0.18422	-0.23333	-0.32916	301.826
302	0.002163	0.983036	-0.04915	-0.18745	-0.2366	-0.1287	302.062
303	0.002166	0.98477	-0.04924	-0.19052	-0.23976	-0.26723	302.106
304	0.002172	0.987092	-0.04935	-0.1934	-0.24275	-0.34074	304.835
305	0.002176	0.989275	-0.04946	-0.19614	-0.2456	-0.1376	305.056
306	0.002179	0.990486	-0.04952	-0.19883	-0.24835	-0.27596	305.105
307	0.002181	0.99138	-0.04957	-0.20134	-0.2509	-0.35038	307.834
308	0.002183	0.992457	-0.04962	-0.20364	-0.25327	-0.1453	308.055
309	0.002187	0.994128	-0.04971	-0.20569	-0.2554	-0.282	308.104
310	0.002191	0.995796	-0.04979	-0.20763	-0.25742	-0.3571	310.833
311	0.002194	0.997279	-0.04986	-0.20941	-0.25928	-0.151	311.055
312	0.002196	0.998371	-0.04992	-0.21104	-0.26096	-0.28801	311.102
313	0.002198	0.999257	-0.04996	-0.21241	-0.26238	-0.36358	313.832
314	0.0022	0.999902	-0.05	-0.21348	-0.26348	-0.15528	314.055
315	0.002201	1.00045	-0.05002	-0.21428	-0.2643	-0.29295	314.102
316	0.002201	1.00065	-0.05003	-0.21477	-0.2648	-0.36631	316.83
317	0.0022	1.0001	-0.05	-0.21508	-0.26508	-0.15771	317.054
318	0.002198	0.999281	-0.04996	-0.21527	-0.26524	-0.29392	317.102
319	0.002198	0.99902	-0.04995	-0.21543	-0.26538	-0.36622	319.832
320	0.002199	0.999438	-0.04997	-0.21537	-0.26534	-0.15796	320.054
321	0.002201	1.00035	-0.05002	-0.21501	-0.26503	-0.29362	320.101
322	0.002202	1.00077	-0.05004	-0.21453	-0.26457	-0.36728	322.831
323	0.002202	1.0008	-0.05004	-0.2139	-0.26394	-0.15537	323.054
324	0.002201	1.00032	-0.05002	-0.21316	-0.26317	-0.29381	323.101
325	0.0022	0.99989	-0.04999	-0.21212	-0.26211	-0.36288	325.83
326	0.002199	0.999607	-0.04998	-0.21095	-0.26093	-0.15302	326.056
327	0.002199	0.999628	-0.04998	-0.20963	-0.25962	-0.28773	326.102
328	0.0022	0.99981	-0.04999	-0.20827	-0.25826	-0.35954	328.831
329	0.002199	0.999624	-0.04998	-0.20684	-0.25682	-0.14915	329.055
330	0.002197	0.998853	-0.04994	-0.20545	-0.25539	-0.28383	329.102
331	0.002195	0.997952	-0.0499	-0.20419	-0.25408	-0.35516	331.831
332	0.002193	0.997042	-0.04985	-0.20283	-0.25268	-0.14398	332.057
333	0.002192	0.99657	-0.04983	-0.20137	-0.2512	-0.28145	332.1
334	0.002191	0.995899	-0.04979	-0.1998	-0.2496	-0.35033	334.83
335	0.002189	0.994877	-0.04974	-0.19847	-0.24821	-0.13983	335.058
336	0.002184	0.992801	-0.04964	-0.19755	-0.24719	-0.27819	335.1
337	0.00218	0.991044	-0.04955	-0.19679	-0.24635	-0.3452	337.83
338	0.00218	0.990866	-0.04954	-0.1959	-0.24544	-0.13795	338.057
339	0.002185	0.993018	-0.04965	-0.19437	-0.24402	-0.27411	338.101
340	0.00219	0.995528	-0.04978	-0.19242	-0.24219	-0.34165	340.831
341	0.002194	0.997179	-0.04986	-0.19026	-0.24012	-0.13154	341.057
342	0.002195	0.997656	-0.04988	-0.18821	-0.23809	-0.26972	341.102
343	0.002195	0.997549	-0.04988	-0.18627	-0.23615	-0.33642	343.832
344	0.002194	0.997177	-0.04986	-0.18449	-0.23435	-0.12501	344.058
345	0.002193	0.996862	-0.04984	-0.18283	-0.23267	-0.26629	344.103
346	0.002194	0.997078	-0.04985	-0.18126	-0.23112	-0.33009	346.834
347	0.002197	0.998474	-0.04992	-0.17969	-0.22962	-0.12021	347.057
348	0.002201	1.00048	-0.05002	-0.17804	-0.22807	-0.2594	347.103
349	0.002206	1.00263	-0.05013	-0.17642	-0.22655	-0.32667	349.832
350	0.00221	1.00456	-0.05023	-0.1748	-0.22503	-0.11517	350.058
351	0.002214	1.0064	-0.05032	-0.17325	-0.22357	-0.25684	350.101
352	0.002218	1.00823	-0.05041	-0.1717	-0.22211	-0.32401	352.831
353	0.002221	1.00945	-0.05047	-0.17028	-0.22075	-0.11098	353.059
354	0.002222	1.01016	-0.05051	-0.16901	-0.21951	-0.25167	353.103
355	0.002223	1.01044	-0.05052	-0.16782	-0.21834	-0.31779	355.832
356	0.002224	1.01085	-0.05054	-0.16662	-0.21716	-0.10669	356.058
357	0.002226	1.01173	-0.05059	-0.16533	-0.21591	-0.25142	356.102
358	0.002229	1.01305	-0.05065	-0.16395	-0.21461	-0.31605	358.83
359	0.002232	1.01462	-0.05073	-0.16259	-0.21332	-0.10125	359.059
360	0.002235	1.01571	-0.05079	-0.16136	-0.21215	-0.24641	359.101
361	0.002236	1.01646	-0.05082	-0.16022	-0.21104	-0.31328	361.83
362	0.002238	1.01707	-0.05085	-0.15914	-0.20999	-0.0983	362.059
363	0.002239	1.01784	-0.05089	-0.15808	-0.20898	-0.24308	362.101
364	0.00224	1.0184	-0.05092	-0.15702	-0.20794	-0.30985	364.83
365	0.00224	1.01798	-0.0509	-0.15603	-0.20693	-0.09526	365.06
366	0.002237	1.0169	-0.05085	-0.15519	-0.20603	-0.24069	365.102
367	0.002234	1.0156	-0.05078	-0.15449	-0.20527	-0.30584	367.832
Table 2: Thermodynamic data of Fusarium oxysporum biomass on Beta vulgaris substrate
Temperature (K)	Heat Capacity (J/K)	Specific Heat Capacity (J/g.K)	Reversing Heat Flow (W/g)	Non-Reversing Heat Flow (W/g)	Total Heat Flow (W/g)	Modulated Heat flow (W/g)	Modulated Temperature (K)
128	0.000385	0.210361	-0.01052	-0.1481	-0.15862	-0.12848	128.121
129	0.000383	0.208927	-0.01045	-0.1512	-0.16165	-0.12577	129.405
130	0.00038	0.207654	-0.01038	-0.14065	-0.15103	-0.10402	129.008
131	0.000387	0.21125	-0.01056	-0.13215	-0.14271	-0.14276	131.882
132	0.000392	0.21431	-0.01072	-0.12825	-0.13897	-0.11375	131.853
133	0.000395	0.215974	-0.0108	-0.12578	-0.13658	-0.1104	132.197
134	0.000397	0.216652	-0.01083	-0.12434	-0.13517	-0.14659	134.983
135	0.000396	0.216152	-0.01081	-0.12356	-0.13437	-0.11162	134.762
136	0.000395	0.215575	-0.01078	-0.12278	-0.13355	-0.11108	135.245
137	0.000394	0.215214	-0.01076	-0.12236	-0.13312	-0.14514	137.988
138	0.000396	0.216247	-0.01081	-0.12216	-0.13297	-0.11259	137.749
139	0.0004	0.21839	-0.01092	-0.12186	-0.13277	-0.11065	138.256
140	0.000404	0.220746	-0.01104	-0.1213	-0.13234	-0.14665	140.978
141	0.000407	0.22243	-0.01112	-0.12065	-0.13177	-0.10902	140.749
142	0.000409	0.223502	-0.01118	-0.12019	-0.13136	-0.1108	141.269
143	0.000411	0.224554	-0.01123	-0.11987	-0.1311	-0.14472	143.968
144	0.000414	0.225928	-0.0113	-0.11964	-0.13094	-0.10948	143.751
145	0.000416	0.227344	-0.01137	-0.11948	-0.13085	-0.11187	144.269
146	0.000418	0.228316	-0.01142	-0.11928	-0.13069	-0.14596	146.962
147	0.000418	0.228471	-0.01142	-0.11904	-0.13047	-0.10802	146.755
148	0.000417	0.227815	-0.01139	-0.11899	-0.13038	-0.11271	147.267
149	0.000417	0.227597	-0.01138	-0.11904	-0.13042	-0.14551	149.963
150	0.000419	0.228857	-0.01144	-0.11907	-0.13051	-0.10908	149.755
151	0.000425	0.232039	-0.0116	-0.11886	-0.13046	-0.11185	150.273
152	0.00043	0.234829	-0.01174	-0.11849	-0.13023	-0.14852	152.958
153	0.000433	0.236731	-0.01184	-0.11811	-0.12994	-0.10657	152.759
154	0.000434	0.237237	-0.01186	-0.11785	-0.12971	-0.11043	153.27
155	0.000435	0.237679	-0.01188	-0.11758	-0.12946	-0.1468	155.956
156	0.000435	0.237308	-0.01187	-0.11733	-0.12919	-0.10605	155.761
157	0.000434	0.236901	-0.01185	-0.11715	-0.12899	-0.11156	156.269
158	0.000434	0.237235	-0.01186	-0.11709	-0.12895	-0.14593	158.954
159	0.000438	0.238948	-0.01195	-0.11709	-0.12904	-0.10476	158.764
160	0.000441	0.240862	-0.01204	-0.1171	-0.12915	-0.11177	159.276
161	0.000443	0.241836	-0.01209	-0.1171	-0.12919	-0.1483	161.959
162	0.000443	0.241871	-0.01209	-0.11706	-0.12915	-0.10616	161.76
163	0.000442	0.241503	-0.01208	-0.11701	-0.12908	-0.11092	162.273
164	0.000442	0.241278	-0.01206	-0.11694	-0.12901	-0.14848	164.956
165	0.000442	0.241371	-0.01207	-0.11685	-0.12892	-0.10675	164.763
166	0.000444	0.242236	-0.01211	-0.11665	-0.12876	-0.11284	165.27
167	0.000446	0.243445	-0.01217	-0.1164	-0.12857	-0.14897	167.955
168	0.000448	0.244836	-0.01224	-0.11617	-0.12841	-0.10435	167.765
169	0.00045	0.245801	-0.01229	-0.11602	-0.12831	-0.11058	168.266
170	0.000452	0.246912	-0.01235	-0.11584	-0.12819	-0.14896	170.952
171	0.000454	0.247894	-0.01239	-0.11567	-0.12806	-0.1045	170.767
172	0.000457	0.249586	-0.01248	-0.11544	-0.12792	-0.1103	171.264
173	0.00046	0.251234	-0.01256	-0.11535	-0.12791	-0.14959	173.952
174	0.000463	0.252825	-0.01264	-0.11534	-0.12798	-0.10356	173.769
175	0.000464	0.253583	-0.01268	-0.11541	-0.12809	-0.11259	174.263
176	0.000465	0.253781	-0.01269	-0.1154	-0.12809	-0.15012	176.95
177	0.000464	0.253652	-0.01268	-0.11529	-0.12797	-0.1021	176.765
178	0.000464	0.253673	-0.01268	-0.11515	-0.12783	-0.11177	177.271
179	0.000465	0.254094	-0.0127	-0.11503	-0.12774	-0.14976	179.956
180	0.000467	0.255117	-0.01276	-0.11499	-0.12774	-0.10228	179.768
181	0.000469	0.256376	-0.01282	-0.115	-0.12781	-0.11256	180.267
182	0.000473	0.258073	-0.0129	-0.11501	-0.12791	-0.1513	182.954
183	0.000476	0.259804	-0.01299	-0.1151	-0.12809	-0.10203	182.77
184	0.00048	0.262193	-0.01311	-0.11515	-0.12826	-0.11327	183.265
185	0.000484	0.264604	-0.01323	-0.11526	-0.12849	-0.15264	185.953
186	0.00049	0.267839	-0.01339	-0.11538	-0.12877	-0.10318	185.77
187	0.000497	0.271358	-0.01357	-0.11547	-0.12904	-0.11624	186.266
188	0.000504	0.275164	-0.01376	-0.11553	-0.12929	-0.15326	188.953
189	0.000509	0.278024	-0.0139	-0.11553	-0.12943	-0.10202	188.771
190	0.000513	0.280406	-0.01402	-0.11558	-0.1296	-0.11545	189.263
191	0.000517	0.282247	-0.01411	-0.11576	-0.12988	-0.15489	191.951
192	0.000521	0.284364	-0.01422	-0.11598	-0.1302	-0.10088	191.773
193	0.000525	0.286803	-0.01434	-0.11617	-0.13051	-0.11868	192.258
194	0.000531	0.290032	-0.0145	-0.11621	-0.13071	-0.1569	194.957
195	0.00054	0.294717	-0.01474	-0.11618	-0.13092	-0.10171	194.776
196	0.000546	0.298435	-0.01492	-0.11621	-0.13114	-0.11917	195.255
197	0.000552	0.301665	-0.01508	-0.11629	-0.13138	-0.15815	197.956
198	0.000559	0.305274	-0.01526	-0.11634	-0.1316	-0.10105	197.773
199	0.000567	0.30955	-0.01548	-0.11624	-0.13172	-0.1217	198.266
200	0.000575	0.313911	-0.0157	-0.11606	-0.13176	-0.15957	200.955
201	0.000582	0.317606	-0.01588	-0.11595	-0.13183	-0.09992	200.774
202	0.000586	0.320054	-0.016	-0.11606	-0.13206	-0.12197	201.264
203	0.000589	0.321942	-0.0161	-0.11628	-0.13238	-0.16139	203.954
204	0.000593	0.32397	-0.0162	-0.11653	-0.13273	-0.09912	203.776
205	0.000598	0.326373	-0.01632	-0.11672	-0.13304	-0.12477	204.261
206	0.000603	0.329112	-0.01646	-0.11681	-0.13327	-0.16281	206.953
207	0.000607	0.331559	-0.01658	-0.11683	-0.13341	-0.1	206.776
208	0.000611	0.333831	-0.01669	-0.11685	-0.13355	-0.12571	207.26
209	0.000615	0.335631	-0.01678	-0.11695	-0.13373	-0.16462	209.952
210	0.000618	0.337662	-0.01688	-0.11707	-0.13396	-0.09786	209.778
211	0.000623	0.339983	-0.017	-0.11713	-0.13413	-0.12726	210.258
212	0.000628	0.342856	-0.01714	-0.11704	-0.13419	-0.16573	212.951
213	0.000634	0.346025	-0.0173	-0.11699	-0.13429	-0.09868	212.779
214	0.000639	0.349174	-0.01746	-0.11702	-0.13448	-0.12795	213.258
215	0.000645	0.352008	-0.0176	-0.11714	-0.13474	-0.16706	215.951
216	0.000648	0.353864	-0.01769	-0.11727	-0.13497	-0.09843	215.779
217	0.00065	0.355231	-0.01776	-0.11743	-0.13519	-0.13067	216.258
218	0.000653	0.356638	-0.01783	-0.11759	-0.13543	-0.16849	218.951
219	0.000657	0.359074	-0.01795	-0.11773	-0.13569	-0.09833	218.779
220	0.000663	0.361826	-0.01809	-0.11785	-0.13594	-0.13105	219.255
221	0.000668	0.364584	-0.01823	-0.118	-0.13623	-0.17039	221.949
222	0.000672	0.367014	-0.01835	-0.11818	-0.13653	-0.0982	221.78
223	0.000678	0.370256	-0.01851	-0.11826	-0.13678	-0.13284	222.254
224	0.000685	0.374031	-0.0187	-0.1183	-0.13701	-0.17227	224.948
225	0.000692	0.377771	-0.01889	-0.11836	-0.13725	-0.09645	224.781
226	0.000696	0.380083	-0.019	-0.11853	-0.13753	-0.13562	225.253
227	0.000698	0.381337	-0.01907	-0.11868	-0.13775	-0.17442	227.948
228	0.0007	0.382362	-0.01912	-0.11874	-0.13786	-0.0985	227.776
229	0.000703	0.38414	-0.01921	-0.11868	-0.13789	-0.13531	228.263
230	0.000708	0.38677	-0.01934	-0.11854	-0.13787	-0.17512	230.954
231	0.000714	0.389852	-0.01949	-0.11845	-0.13794	-0.09759	230.778
232	0.00072	0.393095	-0.01965	-0.11842	-0.13807	-0.13694	231.263
233	0.000726	0.396485	-0.01982	-0.11853	-0.13835	-0.17624	233.955
234	0.000732	0.399973	-0.02	-0.11864	-0.13864	-0.09614	233.778
235	0.000738	0.403181	-0.02016	-0.11875	-0.13891	-0.13917	234.262
236	0.000743	0.405987	-0.0203	-0.11882	-0.13912	-0.1783	236.954
237	0.000748	0.408247	-0.02041	-0.11884	-0.13925	-0.09623	236.779
238	0.000752	0.410897	-0.02054	-0.11886	-0.13941	-0.14062	237.259
239	0.000757	0.413697	-0.02068	-0.11894	-0.13962	-0.17971	239.952
240	0.000764	0.417225	-0.02086	-0.11908	-0.13995	-0.09489	239.781
241	0.00077	0.420434	-0.02102	-0.11929	-0.14031	-0.1432	240.256
242	0.000776	0.423801	-0.02119	-0.11944	-0.14063	-0.18268	242.95
243	0.000782	0.427021	-0.02135	-0.11961	-0.14096	-0.09545	242.782
244	0.000788	0.430309	-0.02152	-0.11975	-0.14126	-0.14347	243.256
245	0.000793	0.43331	-0.02167	-0.11986	-0.14153	-0.18499	245.95
246	0.000799	0.43623	-0.02181	-0.11995	-0.14176	-0.09495	245.783
247	0.000805	0.439658	-0.02198	-0.12001	-0.14199	-0.14549	246.254
248	0.000812	0.443215	-0.02216	-0.1201	-0.14226	-0.18574	248.949
249	0.000817	0.446391	-0.02232	-0.12027	-0.14259	-0.09513	248.783
250	0.000822	0.449125	-0.02246	-0.12055	-0.14301	-0.14697	249.254
251	0.000827	0.451835	-0.02259	-0.12097	-0.14356	-0.18755	251.949
252	0.000834	0.455269	-0.02276	-0.12146	-0.14422	-0.09568	251.783
253	0.000841	0.459175	-0.02296	-0.12189	-0.14485	-0.15012	252.251
254	0.000849	0.463563	-0.02318	-0.12225	-0.14542	-0.19139	254.955
255	0.000857	0.46797	-0.0234	-0.12254	-0.14594	-0.09563	254.779
256	0.000864	0.472069	-0.0236	-0.1229	-0.14651	-0.1524	255.261
257	0.000871	0.475868	-0.02379	-0.12335	-0.14715	-0.19412	257.954
258	0.000877	0.47914	-0.02396	-0.12395	-0.14791	-0.09717	257.78
259	0.000883	0.482376	-0.02412	-0.12464	-0.14876	-0.15581	258.26
260	0.000889	0.485324	-0.02427	-0.12535	-0.14962	-0.1973	260.953
261	0.000894	0.488187	-0.02441	-0.12612	-0.15052	-0.09862	260.78
262	0.000899	0.491049	-0.02455	-0.12692	-0.15147	-0.1598	261.261
263	0.000904	0.493948	-0.0247	-0.12781	-0.15251	-0.20177	263.954
264	0.00091	0.496923	-0.02485	-0.12884	-0.15368	-0.10108	263.778
265	0.000916	0.500065	-0.025	-0.13007	-0.15507	-0.16361	264.257
266	0.000923	0.503889	-0.02519	-0.13154	-0.15674	-0.20728	266.951
267	0.000931	0.508391	-0.02542	-0.13335	-0.15877	-0.10467	266.779
268	0.000939	0.512703	-0.02564	-0.13548	-0.16111	-0.1701	267.257
269	0.000944	0.515831	-0.02579	-0.13785	-0.16364	-0.21516	269.951
270	0.000949	0.51828	-0.02591	-0.14076	-0.16667	-0.11178	269.777
271	0.000951	0.519345	-0.02597	-0.14434	-0.17031	-0.17975	270.258
272	0.000955	0.521418	-0.02607	-0.14833	-0.1744	-0.22735	272.952
273.15	0.000961	0.52483	-0.02624	-0.15249	-0.17873	-0.1224	272.635
274	0.000969	0.529162	-0.02646	-0.15497	-0.18143	-0.19141	273.256
275	0.000977	0.533469	-0.02667	-0.15757	-0.18424	-0.23865	275.957
276	0.000982	0.536383	-0.02682	-0.16011	-0.18693	-0.13162	275.771
277	0.000984	0.537672	-0.02688	-0.16296	-0.18984	-0.20102	276.265
278	0.000987	0.539153	-0.02696	-0.16593	-0.19288	-0.24738	278.955
279	0.000992	0.541517	-0.02708	-0.16908	-0.19616	-0.1406	278.772
280	0.000997	0.544396	-0.02722	-0.1723	-0.19952	-0.21058	279.266
281	0.001001	0.546815	-0.02734	-0.1756	-0.20295	-0.25975	281.956
282	0.001005	0.548803	-0.02744	-0.17901	-0.20645	-0.15049	281.768
283	0.001009	0.551066	-0.02755	-0.18248	-0.21003	-0.22184	282.264
284	0.001015	0.554139	-0.02771	-0.18603	-0.21373	-0.27037	284.955
285	0.001021	0.55787	-0.02789	-0.18964	-0.21754	-0.1607	284.768
286	0.001027	0.560884	-0.02804	-0.19348	-0.22152	-0.23391	285.262
287	0.001031	0.563231	-0.02816	-0.19754	-0.2257	-0.28463	287.96
288	0.001034	0.564548	-0.02823	-0.20169	-0.22992	-0.17305	287.762
289	0.001035	0.565401	-0.02827	-0.20592	-0.23419	-0.24647	288.272
290	0.001037	0.566407	-0.02832	-0.21007	-0.23839	-0.2992	290.959
291	0.00104	0.568071	-0.0284	-0.21424	-0.24264	-0.18672	290.761
292	0.001043	0.569764	-0.02849	-0.21837	-0.24686	-0.26137	291.272
293	0.001045	0.570832	-0.02854	-0.2225	-0.25104	-0.31224	293.958
294	0.001046	0.571431	-0.02857	-0.2264	-0.25497	-0.1985	293.759
295	0.001048	0.572131	-0.02861	-0.23007	-0.25868	-0.27275	294.269
296	0.001049	0.572832	-0.02864	-0.2334	-0.26204	-0.32525	296.956
297	0.001049	0.572896	-0.02864	-0.23649	-0.26513	-0.20854	296.759
298.15	0.001048	0.572468	-0.02862	-0.23979	-0.26841	-0.30345	297.665
299	0.001048	0.572378	-0.02862	-0.2421	-0.27071	-0.33466	299.956
300	0.001049	0.572775	-0.02864	-0.2446	-0.27324	-0.21786	299.753
301	0.00105	0.5734	-0.02867	-0.24681	-0.27548	-0.28858	300.28
302	0.00105	0.573554	-0.02868	-0.24879	-0.27747	-0.34291	302.962
303	0.001049	0.573122	-0.02866	-0.25061	-0.27927	-0.22369	302.752
304	0.001048	0.572174	-0.02861	-0.25228	-0.28089	-0.29556	303.28
305	0.001046	0.571179	-0.02856	-0.25355	-0.28211	-0.34697	305.962
306	0.001042	0.56924	-0.02846	-0.25451	-0.28297	-0.22843	305.75
307	0.001039	0.567197	-0.02836	-0.2552	-0.28356	-0.29734	306.272
308	0.001034	0.564893	-0.02824	-0.25582	-0.28406	-0.34761	308.965
309	0.001032	0.563488	-0.02817	-0.25602	-0.28419	-0.23004	308.748
310	0.001031	0.562851	-0.02814	-0.25584	-0.28399	-0.29696	309.28
311	0.001031	0.563117	-0.02816	-0.25544	-0.2836	-0.34753	311.963
312	0.001032	0.563461	-0.02817	-0.25486	-0.28303	-0.22769	311.748
313	0.00103	0.562565	-0.02813	-0.25419	-0.28232	-0.29631	312.28
314	0.001026	0.560537	-0.02803	-0.25337	-0.2814	-0.34543	314.961
315	0.001022	0.558407	-0.02792	-0.25239	-0.28031	-0.22668	314.75
316	0.001021	0.557521	-0.02788	-0.25113	-0.27901	-0.29223	315.279
317	0.00102	0.557199	-0.02786	-0.24969	-0.27755	-0.34246	317.961
318	0.00102	0.55692	-0.02785	-0.24812	-0.27596	-0.22162	317.751
319	0.001018	0.555977	-0.0278	-0.24657	-0.27437	-0.28834	318.278
320	0.001016	0.554885	-0.02774	-0.245	-0.27275	-0.33719	320.961
321	0.001012	0.552883	-0.02764	-0.24346	-0.27111	-0.21594	320.752
322	0.001007	0.549767	-0.02749	-0.24205	-0.26954	-0.28465	321.278
323	0.001	0.546105	-0.02731	-0.24064	-0.26794	-0.33202	323.962
324	0.000993	0.542483	-0.02712	-0.23925	-0.26637	-0.21364	323.752
325	0.000989	0.540003	-0.027	-0.23766	-0.26466	-0.27988	324.279
326	0.000986	0.538264	-0.02691	-0.23596	-0.26287	-0.32476	326.963
327	0.000983	0.53712	-0.02686	-0.23412	-0.26098	-0.20855	326.751
328	0.00098	0.535448	-0.02677	-0.23227	-0.25904	-0.27424	327.28
329	0.000976	0.532971	-0.02665	-0.23044	-0.25709	-0.31816	329.964
330	0.000971	0.530057	-0.0265	-0.2287	-0.2552	-0.20385	329.752
331	0.000965	0.526908	-0.02635	-0.22722	-0.25356	-0.26891	330.28
332	0.00096	0.524383	-0.02622	-0.2261	-0.25232	-0.313	332.963
333	0.000957	0.522505	-0.02613	-0.22512	-0.25125	-0.20016	332.752
334	0.000956	0.522156	-0.02611	-0.22376	-0.24987	-0.26694	333.28
335	0.000956	0.522049	-0.0261	-0.22184	-0.24794	-0.30923	335.963
336	0.000955	0.521386	-0.02607	-0.2195	-0.24557	-0.19398	335.752
337	0.000952	0.519838	-0.02599	-0.21715	-0.24314	-0.25944	336.28
338	0.000949	0.518457	-0.02592	-0.21492	-0.24085	-0.30096	338.963
339	0.000948	0.517953	-0.0259	-0.21302	-0.23891	-0.18841	338.758
340	0.000948	0.51776	-0.02589	-0.21133	-0.23722	-0.25153	339.27
341	0.000947	0.516959	-0.02585	-0.20986	-0.23571	-0.29601	341.957
342	0.000944	0.515683	-0.02578	-0.2084	-0.23419	-0.18366	341.757
343	0.000942	0.514553	-0.02573	-0.20691	-0.23264	-0.24988	342.28
344	0.000941	0.514164	-0.02571	-0.20543	-0.23114	-0.2915	344.963
345	0.000942	0.514485	-0.02572	-0.20388	-0.2296	-0.17886	344.751
346	0.000943	0.515169	-0.02576	-0.20223	-0.22799	-0.24342	345.279
347	0.000944	0.515497	-0.02577	-0.20056	-0.22633	-0.28561	347.962
348	0.000943	0.514925	-0.02575	-0.19899	-0.22474	-0.17395	347.753
349	0.000941	0.51382	-0.02569	-0.19756	-0.22325	-0.23938	348.28
350	0.00094	0.51348	-0.02567	-0.19615	-0.22182	-0.2806	350.962
351	0.000942	0.514432	-0.02572	-0.19474	-0.22046	-0.1698	350.753
352	0.000944	0.51574	-0.02579	-0.19335	-0.21913	-0.23443	351.278
353	0.000945	0.515847	-0.02579	-0.19206	-0.21785	-0.27795	353.962
354	0.000943	0.514939	-0.02575	-0.19064	-0.21639	-0.16492	353.756
355	0.000941	0.513704	-0.02569	-0.18916	-0.21484	-0.23266	354.275
356	0.00094	0.513144	-0.02566	-0.18758	-0.21324	-0.2732	356.961
357	0.000938	0.512498	-0.02562	-0.18627	-0.21189	-0.16064	356.756
358	0.000937	0.511569	-0.02558	-0.18513	-0.21071	-0.22847	357.277
359	0.000934	0.510301	-0.02552	-0.18404	-0.20955	-0.26901	359.961
360	0.000932	0.509168	-0.02546	-0.18285	-0.20831	-0.15699	359.756
361	0.000931	0.508635	-0.02543	-0.18153	-0.20697	-0.22492	360.276
362	0.000931	0.508309	-0.02542	-0.18018	-0.20559	-0.26551	362.961
363	0.00093	0.507862	-0.02539	-0.17892	-0.20431	-0.15444	362.755
364	0.000928	0.507052	-0.02535	-0.17774	-0.2031	-0.22232	363.278
365	0.000927	0.506461	-0.02532	-0.17662	-0.20195	-0.2608	365.962
366	0.000928	0.506881	-0.02534	-0.17541	-0.20076	-0.14993	365.754
367	0.00093	0.507758	-0.02539	-0.17418	-0.19957	-0.21703	366.276
Table 3: Thermodynamic data of Fusarium oxysporum biomass on Beta vulgaris with cyanide substrate
Temperature (K)	Heat Capacity (J/K)	Specific Heat Capacity (J/g.K)	Reversing Heat Flow (W/g)	Non-Reversing Heat Flow (W/g)	Total Heat Flow (W/g)	Modulated Heat flow (W/g)	Modulated Temperature (K)
127	0.00046	0.269885	-0.01349	-0.18484	-0.19833	-0.15401	127.838
128	0.000463	0.271611	-0.01358	-0.17519	-0.18877	-0.11475	126.981
129	0.00047	0.276263	-0.01381	-0.16308	-0.17689	-0.19075	129.44
130	0.000475	0.27871	-0.01394	-0.15731	-0.17125	-0.12404	130.441
131	0.000483	0.283555	-0.01418	-0.15349	-0.16767	-0.13252	129.973
132	0.000493	0.289197	-0.01446	-0.15074	-0.1652	-0.19184	132.64
133	0.000502	0.294726	-0.01474	-0.14932	-0.16405	-0.11909	133.35
134	0.000509	0.298719	-0.01494	-0.14836	-0.1633	-0.13616	132.99
135	0.000515	0.302132	-0.01511	-0.14756	-0.16267	-0.19173	135.667
136	0.00052	0.305195	-0.01526	-0.14684	-0.1621	-0.11756	136.33
137	0.000526	0.308975	-0.01545	-0.14605	-0.1615	-0.13585	136.004
138	0.000533	0.312717	-0.01564	-0.14549	-0.16112	-0.19151	138.665
139	0.00054	0.31724	-0.01586	-0.14504	-0.1609	-0.11695	139.324
140	0.000548	0.321868	-0.01609	-0.14466	-0.16076	-0.13157	139.009
141	0.000556	0.326554	-0.01633	-0.1442	-0.16052	-0.19242	141.656
142	0.000563	0.330777	-0.01654	-0.14359	-0.16012	-0.11462	142.319
143	0.000569	0.334111	-0.01671	-0.14304	-0.15975	-0.1342	142.017
144	0.000573	0.33674	-0.01684	-0.14254	-0.15938	-0.19258	144.659
145	0.000576	0.338337	-0.01692	-0.14202	-0.15894	-0.11484	145.323
146	0.000579	0.340207	-0.01701	-0.14152	-0.15853	-0.13276	145.017
147	0.000583	0.342592	-0.01713	-0.14097	-0.1581	-0.19213	147.655
148	0.000589	0.346051	-0.0173	-0.14048	-0.15778	-0.11186	148.324
149	0.000595	0.349271	-0.01746	-0.14013	-0.15759	-0.13113	148.016
150	0.000599	0.351907	-0.0176	-0.13994	-0.15754	-0.19292	150.649
151	0.000603	0.353918	-0.0177	-0.13974	-0.15743	-0.11235	151.327
152	0.000606	0.355927	-0.0178	-0.13943	-0.15723	-0.13189	151.015
153	0.000609	0.357743	-0.01789	-0.13906	-0.15694	-0.19323	153.657
154	0.000613	0.359988	-0.018	-0.13871	-0.15671	-0.1104	154.324
155	0.000618	0.362628	-0.01813	-0.13842	-0.15656	-0.13213	154.02
156	0.000624	0.366206	-0.01831	-0.1381	-0.15641	-0.1943	156.652
157	0.00063	0.369761	-0.01849	-0.13776	-0.15625	-0.10966	157.327
158	0.000635	0.372621	-0.01863	-0.13744	-0.15607	-0.13089	157.018
159	0.000638	0.374386	-0.01872	-0.1372	-0.15592	-0.19548	159.648
160	0.000638	0.374845	-0.01874	-0.13694	-0.15569	-0.1104	160.329
161	0.000639	0.375259	-0.01876	-0.13666	-0.15542	-0.13092	160.017
162	0.00064	0.375962	-0.0188	-0.13635	-0.15515	-0.19496	162.642
163	0.000644	0.377904	-0.0189	-0.13602	-0.15492	-0.10776	163.333
164	0.000647	0.380152	-0.01901	-0.13566	-0.15467	-0.13003	163.015
165	0.000652	0.382953	-0.01915	-0.13525	-0.15439	-0.19578	165.639
166	0.000656	0.385372	-0.01927	-0.13495	-0.15422	-0.10589	166.331
167	0.000659	0.387254	-0.01936	-0.1349	-0.15426	-0.13281	166.02
168	0.000661	0.388069	-0.0194	-0.13499	-0.15439	-0.1966	168.648
169	0.000662	0.388601	-0.01943	-0.13504	-0.15447	-0.10804	169.333
170	0.000663	0.38952	-0.01948	-0.13492	-0.15439	-0.13	169.019
171	0.000666	0.390949	-0.01955	-0.13463	-0.15418	-0.19724	171.645
172	0.000669	0.393104	-0.01966	-0.13429	-0.15394	-0.10651	172.335
173	0.000673	0.395401	-0.01977	-0.13393	-0.1537	-0.13078	172.017
174	0.000677	0.397577	-0.01988	-0.13362	-0.1535	-0.19711	174.642
175	0.00068	0.399078	-0.01995	-0.13335	-0.1533	-0.10504	175.336
176	0.000681	0.400059	-0.02	-0.13313	-0.15313	-0.13158	175.016
177	0.000683	0.401075	-0.02005	-0.13289	-0.15294	-0.19728	177.64
178	0.000685	0.402202	-0.02011	-0.13268	-0.15279	-0.10577	178.339
179	0.000687	0.40352	-0.02018	-0.13253	-0.15271	-0.12925	178.016
180	0.000689	0.404765	-0.02024	-0.13249	-0.15273	-0.19695	180.637
181	0.000691	0.406021	-0.0203	-0.13247	-0.15278	-0.10523	181.342
182	0.000694	0.407658	-0.02038	-0.13243	-0.15281	-0.1299	181.014
183	0.000698	0.410028	-0.0205	-0.13234	-0.15284	-0.19808	183.635
184	0.000704	0.413254	-0.02066	-0.13228	-0.15294	-0.10647	184.342
185	0.00071	0.416913	-0.02085	-0.13219	-0.15303	-0.13008	184.013
186	0.000715	0.420111	-0.02101	-0.1322	-0.1532	-0.20053	186.632
187	0.000721	0.423435	-0.02117	-0.13225	-0.15342	-0.10514	187.344
188	0.000726	0.426484	-0.02132	-0.13226	-0.15358	-0.13325	187.012
189	0.000732	0.429706	-0.02149	-0.13219	-0.15368	-0.20143	189.645
190	0.000737	0.432582	-0.02163	-0.1321	-0.15373	-0.10211	190.34
191	0.000742	0.435584	-0.02178	-0.13203	-0.15381	-0.13244	190.017
192	0.000747	0.438609	-0.02193	-0.13208	-0.15401	-0.20269	192.641
193	0.000752	0.441745	-0.02209	-0.13218	-0.15427	-0.10283	193.342
194	0.000758	0.445259	-0.02226	-0.13222	-0.15448	-0.13338	193.016
195	0.000768	0.450969	-0.02255	-0.13207	-0.15462	-0.20472	195.636
196	0.000776	0.455493	-0.02277	-0.13196	-0.15473	-0.10169	196.345
197	0.000782	0.459044	-0.02295	-0.13195	-0.1549	-0.13367	196.015
198	0.000788	0.462627	-0.02313	-0.13189	-0.15502	-0.20551	198.635
199	0.000793	0.465718	-0.02329	-0.13187	-0.15516	-0.10228	199.346
200	0.000798	0.46887	-0.02344	-0.13189	-0.15533	-0.13743	199.015
201	0.000803	0.471293	-0.02356	-0.13198	-0.15554	-0.20768	201.635
202	0.000806	0.473256	-0.02366	-0.13209	-0.15575	-0.10081	202.346
203	0.000809	0.474956	-0.02375	-0.13225	-0.156	-0.1369	202.013
204	0.000812	0.476668	-0.02383	-0.13246	-0.1563	-0.20888	204.632
205	0.000815	0.478434	-0.02392	-0.13267	-0.15659	-0.10028	205.348
206	0.000818	0.480475	-0.02402	-0.1328	-0.15683	-0.13736	205.014
207	0.000823	0.483202	-0.02416	-0.13279	-0.15695	-0.21102	207.631
208	0.000829	0.486998	-0.02435	-0.13272	-0.15707	-0.10197	208.35
209	0.000836	0.491155	-0.02456	-0.13263	-0.15719	-0.13863	208.011
210	0.000843	0.495057	-0.02475	-0.1326	-0.15735	-0.21273	210.628
211	0.000848	0.498134	-0.02491	-0.13264	-0.15755	-0.10035	211.351
212	0.000853	0.500977	-0.02505	-0.13266	-0.15771	-0.13908	211.012
213	0.000858	0.503694	-0.02518	-0.13264	-0.15783	-0.21458	213.628
214	0.000863	0.506765	-0.02534	-0.13259	-0.15793	-0.09903	214.351
215	0.000868	0.50972	-0.02549	-0.13264	-0.15813	-0.14028	214.01
216	0.000874	0.513047	-0.02565	-0.13275	-0.15841	-0.21574	216.626
217	0.000879	0.516321	-0.02582	-0.13286	-0.15868	-0.09837	217.348
218	0.000886	0.52007	-0.026	-0.13284	-0.15884	-0.14152	217.016
219	0.000892	0.523627	-0.02618	-0.13278	-0.15897	-0.21841	219.634
220	0.000899	0.527696	-0.02638	-0.13273	-0.15911	-0.09805	220.35
221	0.000906	0.531772	-0.02659	-0.13274	-0.15933	-0.14237	220.015
222	0.000913	0.536322	-0.02682	-0.13272	-0.15953	-0.22081	222.633
223	0.00092	0.540405	-0.02702	-0.13272	-0.15974	-0.09911	223.351
224	0.000926	0.543628	-0.02718	-0.13276	-0.15994	-0.1433	223.016
225	0.000929	0.545696	-0.02728	-0.13285	-0.16013	-0.22274	225.632
226	0.000932	0.547378	-0.02737	-0.13288	-0.16025	-0.09827	226.351
227	0.000937	0.550291	-0.02751	-0.13272	-0.16024	-0.14587	226.015
228	0.000945	0.554756	-0.02774	-0.1324	-0.16014	-0.22339	228.632
229	0.000954	0.560305	-0.02802	-0.1321	-0.16012	-0.09773	229.352
230	0.000962	0.564853	-0.02824	-0.13198	-0.16022	-0.14408	229.014
231	0.000967	0.567731	-0.02839	-0.13207	-0.16046	-0.22591	231.631
232	0.000969	0.569109	-0.02846	-0.13222	-0.16067	-0.09443	232.353
233	0.000972	0.570684	-0.02853	-0.13241	-0.16095	-0.14559	232.013
234	0.000976	0.5731	-0.02866	-0.13258	-0.16123	-0.22696	234.63
235	0.000981	0.57625	-0.02881	-0.13279	-0.1616	-0.09722	235.353
236	0.000987	0.579399	-0.02897	-0.13296	-0.16193	-0.1467	235.013
237	0.000992	0.582717	-0.02914	-0.13309	-0.16222	-0.22953	237.629
238	0.000998	0.58601	-0.0293	-0.13316	-0.16246	-0.09615	238.353
239	0.001004	0.589614	-0.02948	-0.13322	-0.16271	-0.14776	238.012
240	0.00101	0.593081	-0.02965	-0.13339	-0.16305	-0.23151	240.628
241	0.001017	0.597082	-0.02985	-0.13361	-0.16347	-0.09642	241.354
242	0.001024	0.601001	-0.03005	-0.13382	-0.16387	-0.15041	241.011
243	0.001031	0.605306	-0.03027	-0.13397	-0.16423	-0.2347	243.623
244	0.001038	0.609377	-0.03047	-0.13408	-0.16455	-0.09585	244.356
245	0.001045	0.613497	-0.03067	-0.13418	-0.16485	-0.14876	244.01
246	0.001051	0.617323	-0.03087	-0.13421	-0.16508	-0.2368	246.621
247	0.001057	0.620713	-0.03104	-0.13425	-0.16529	-0.09775	247.357
248	0.001062	0.623764	-0.03119	-0.1344	-0.16558	-0.15171	247.01
249	0.001067	0.626286	-0.03131	-0.13464	-0.16596	-0.2389	249.623
250	0.001072	0.629338	-0.03147	-0.135	-0.16647	-0.09774	250.355
251	0.001078	0.632831	-0.03164	-0.13531	-0.16695	-0.15179	250.01
252	0.001086	0.637468	-0.03187	-0.13557	-0.16744	-0.24153	252.622
253	0.001094	0.642248	-0.03211	-0.13575	-0.16786	-0.0987	253.351
254	0.001102	0.647032	-0.03235	-0.13598	-0.16833	-0.15535	253.015
255	0.001109	0.651042	-0.03255	-0.13639	-0.16895	-0.2451	255.634
256	0.001115	0.654789	-0.03274	-0.13701	-0.16975	-0.09704	256.351
257	0.001122	0.658592	-0.03293	-0.13774	-0.17067	-0.15887	256.015
258	0.001129	0.662745	-0.03314	-0.13848	-0.17162	-0.24886	258.632
259	0.001136	0.667008	-0.03335	-0.13925	-0.1726	-0.10073	259.352
260	0.001143	0.670978	-0.03355	-0.1401	-0.17365	-0.16023	259.013
261	0.001149	0.674511	-0.03373	-0.14107	-0.1748	-0.25368	261.629
262	0.001154	0.677522	-0.03388	-0.14219	-0.17607	-0.1027	262.352
263	0.001159	0.680295	-0.03401	-0.14352	-0.17753	-0.16456	262.013
264	0.001164	0.683394	-0.03417	-0.145	-0.17917	-0.25897	264.626
265	0.001169	0.686431	-0.03432	-0.14673	-0.18105	-0.10818	265.353
266	0.001173	0.688823	-0.03444	-0.14886	-0.1833	-0.17164	265.011
267	0.001177	0.691029	-0.03455	-0.15142	-0.18597	-0.2665	267.626
268	0.001184	0.694949	-0.03475	-0.15421	-0.18896	-0.11692	268.353
269	0.001194	0.701072	-0.03505	-0.15679	-0.19184	-0.17958	268.01
270	0.001205	0.707317	-0.03537	-0.15906	-0.19442	-0.27827	270.625
271	0.001212	0.711538	-0.03558	-0.1612	-0.19678	-0.12068	271.353
272	0.001215	0.713627	-0.03568	-0.16361	-0.19929	-0.18659	271.01
273.15	0.001218	0.715373	-0.03577	-0.16662	-0.20239	-0.27964	273.985
274	0.00122	0.716594	-0.03583	-0.16903	-0.20485	-0.13051	274.347
275	0.001223	0.718224	-0.03591	-0.17194	-0.20786	-0.19552	274.016
276	0.001226	0.720196	-0.03601	-0.17492	-0.21093	-0.29565	276.639
277	0.001231	0.723115	-0.03616	-0.17795	-0.2141	-0.13933	277.346
278	0.001237	0.72656	-0.03633	-0.18098	-0.2173	-0.20613	277.016
279	0.001244	0.730211	-0.03651	-0.1841	-0.22061	-0.30702	279.639
280	0.001249	0.733684	-0.03668	-0.18734	-0.22402	-0.14983	280.344
281	0.001255	0.73695	-0.03685	-0.19073	-0.22758	-0.21735	280.015
282	0.00126	0.739815	-0.03699	-0.19433	-0.23132	-0.31932	282.637
283	0.001265	0.742704	-0.03714	-0.19815	-0.23528	-0.16102	283.343
284	0.00127	0.745906	-0.0373	-0.2022	-0.23949	-0.22689	283.013
285	0.001277	0.750011	-0.0375	-0.20641	-0.24391	-0.33294	285.634
286	0.001285	0.754299	-0.03772	-0.21071	-0.24842	-0.17539	286.343
287	0.00129	0.757658	-0.03788	-0.21525	-0.25314	-0.24045	286.017
288	0.001294	0.759845	-0.03799	-0.2199	-0.2579	-0.34884	288.645
289	0.001296	0.7611	-0.03806	-0.22468	-0.26273	-0.19012	289.337
290	0.001299	0.762517	-0.03813	-0.22945	-0.26758	-0.25402	289.017
291	0.001301	0.764047	-0.0382	-0.23431	-0.27251	-0.36432	291.644
292	0.001304	0.765775	-0.03829	-0.23912	-0.27741	-0.20419	292.336
293	0.001307	0.767312	-0.03837	-0.24387	-0.28224	-0.27027	292.015
294	0.001309	0.76885	-0.03844	-0.24833	-0.28677	-0.37957	294.642
295	0.001312	0.770205	-0.03851	-0.25262	-0.29113	-0.21927	295.335
296	0.001314	0.771323	-0.03857	-0.25677	-0.29533	-0.28371	295.015
297	0.001315	0.772013	-0.0386	-0.26082	-0.29942	-0.39451	297.642
298.15	0.001315	0.772352	-0.03862	-0.2652	-0.30382	-0.22004	298.168
299	0.001315	0.772443	-0.03862	-0.26822	-0.30684	-0.29571	298.02
300	0.001315	0.772335	-0.03862	-0.2716	-0.31022	-0.40515	300.652
301	0.001314	0.771787	-0.03859	-0.27464	-0.31323	-0.2426	301.328
302	0.001313	0.770968	-0.03855	-0.27731	-0.31585	-0.30309	301.018
303	0.001312	0.77021	-0.03851	-0.27958	-0.31809	-0.41394	303.65
304	0.00131	0.769114	-0.03846	-0.28155	-0.32	-0.24999	304.327
305	0.001307	0.767714	-0.03839	-0.28331	-0.32169	-0.30943	304.017
306	0.001304	0.765609	-0.03828	-0.28485	-0.32313	-0.41877	306.651
307	0.001301	0.764144	-0.03821	-0.28599	-0.32419	-0.25555	307.328
308	0.0013	0.763477	-0.03817	-0.28651	-0.32469	-0.31298	307.017
309	0.0013	0.763244	-0.03816	-0.28647	-0.32463	-0.42078	309.649
310	0.001297	0.761832	-0.03809	-0.28599	-0.32408	-0.25422	310.328
311	0.001293	0.759072	-0.03795	-0.28534	-0.32329	-0.30891	310.017
312	0.001287	0.755925	-0.0378	-0.28452	-0.32232	-0.41779	312.65
313	0.001283	0.753139	-0.03766	-0.28346	-0.32111	-0.2532	313.328
314	0.00128	0.751552	-0.03758	-0.28205	-0.31963	-0.30737	313.017
315	0.001278	0.750416	-0.03752	-0.28042	-0.31794	-0.41379	315.65
316	0.001276	0.749274	-0.03746	-0.2787	-0.31616	-0.24639	316.329
317	0.001272	0.747191	-0.03736	-0.27691	-0.31427	-0.30205	316.018
318	0.001268	0.744648	-0.03723	-0.27509	-0.31232	-0.40812	318.649
319	0.001264	0.74195	-0.0371	-0.27299	-0.31009	-0.23996	319.329
320	0.00126	0.739582	-0.03698	-0.27076	-0.30774	-0.29739	319.017
321	0.001255	0.736898	-0.03684	-0.26832	-0.30517	-0.40001	321.65
322	0.001249	0.733585	-0.03668	-0.26593	-0.30261	-0.23417	322.329
323	0.001243	0.729873	-0.03649	-0.2635	-0.29999	-0.28845	322.018
324	0.001237	0.726408	-0.03632	-0.26114	-0.29746	-0.39112	324.651
325	0.001233	0.723825	-0.03619	-0.25867	-0.29486	-0.2256	325.331
326	0.00123	0.722216	-0.03611	-0.25607	-0.29218	-0.28198	325.018
327	0.001228	0.721083	-0.03605	-0.25337	-0.28942	-0.38307	327.649
328	0.001226	0.719853	-0.03599	-0.2507	-0.2867	-0.21799	328.332
329	0.001224	0.718632	-0.03593	-0.24817	-0.2841	-0.27412	328.018
330	0.001222	0.717541	-0.03588	-0.2457	-0.28158	-0.3741	330.651
331	0.001222	0.717579	-0.03588	-0.24347	-0.27935	-0.21115	331.332
332	0.00122	0.716453	-0.03582	-0.24157	-0.27739	-0.26811	331.018
333	0.001217	0.714388	-0.03572	-0.23988	-0.2756	-0.36925	333.65
334	0.001209	0.71014	-0.03551	-0.23797	-0.27348	-0.20693	334.333
335	0.001204	0.706922	-0.03535	-0.23558	-0.27093	-0.26313	334.019
336	0.0012	0.704426	-0.03522	-0.23286	-0.26808	-0.36014	336.636
337	0.001197	0.703142	-0.03516	-0.2302	-0.26536	-0.19804	337.338
338	0.001195	0.701575	-0.03508	-0.22778	-0.26286	-0.25405	337.014
339	0.001192	0.700169	-0.03501	-0.22556	-0.26057	-0.35145	339.641
340	0.001191	0.699368	-0.03497	-0.22338	-0.25835	-0.19149	340.337
341	0.001191	0.69933	-0.03497	-0.22115	-0.25612	-0.24789	340.013
342	0.001192	0.699806	-0.03499	-0.21893	-0.25392	-0.34557	342.639
343	0.001192	0.700195	-0.03501	-0.21677	-0.25178	-0.18427	343.338
344	0.001193	0.700386	-0.03502	-0.21467	-0.24969	-0.2411	343.013
345	0.001192	0.700091	-0.035	-0.21267	-0.24768	-0.3385	345.639
346	0.001192	0.699936	-0.035	-0.2107	-0.2457	-0.1779	346.339
347	0.001192	0.699689	-0.03498	-0.20882	-0.2438	-0.23693	346.013
348	0.001191	0.699391	-0.03497	-0.20699	-0.24195	-0.33421	348.64
349	0.00119	0.698821	-0.03494	-0.20527	-0.24022	-0.17171	349.338
350	0.00119	0.698639	-0.03493	-0.20358	-0.23852	-0.23109	349.013
351	0.00119	0.698957	-0.03495	-0.20192	-0.23687	-0.32879	351.639
352	0.001191	0.699363	-0.03497	-0.20024	-0.23521	-0.16544	352.339
353	0.001191	0.699379	-0.03497	-0.19859	-0.23356	-0.22676	352.014
354	0.001191	0.699237	-0.03496	-0.19692	-0.23188	-0.32359	354.64
355	0.001191	0.699394	-0.03497	-0.19522	-0.23019	-0.16172	355.339
356	0.001191	0.699408	-0.03497	-0.19351	-0.22848	-0.22157	355.012
357	0.001191	0.699305	-0.03497	-0.19182	-0.22678	-0.3191	357.636
358	0.001191	0.699186	-0.03496	-0.19016	-0.22512	-0.15652	358.341
359	0.001191	0.699062	-0.03495	-0.18866	-0.22361	-0.21524	358.013
360	0.00119	0.698896	-0.03494	-0.18729	-0.22223	-0.31539	360.636
361	0.00119	0.698523	-0.03493	-0.18603	-0.22096	-0.15234	361.341
362	0.00119	0.698789	-0.03494	-0.18467	-0.21961	-0.21497	361.012
363	0.001191	0.699638	-0.03498	-0.1833	-0.21828	-0.31196	363.634
364	0.001194	0.700877	-0.03504	-0.18192	-0.21696	-0.14847	364.342
365	0.001195	0.701808	-0.03509	-0.18062	-0.21571	-0.21124	364.019
366	0.001196	0.702225	-0.03511	-0.17929	-0.2144	-0.30895	366.646
367	0.001197	0.702694	-0.03513	-0.17799	-0.21312	-0.14408	367.337
